# Supplementary material for: Performance of A-stage process treating combined municipal-industrial wastewater
Source: Oxford University Press journal article supplement (doi:10.2166/wst.2016.511), 2016-10-31
Supplement: wst2016511supp.docx [file wst2016511supp.docx]

Supplementary material

**Figure A1.** Calorific value of spent sludge.

**Figure A2.** Evolution of SCOD and nitrogen (as ammonium ion) (left axis) and phosphorus (as phosphate ion) (right axis) in the supernatant of digested spent sludge.
